# Supplementary material for: Combined Phylogeographic Analyses and Epidemiologic Contact Tracing to Characterize Atypically Pathogenic Avian Influenza (H3N1) Epidemic, Belgium, 2019
Source: PubMed Central journal article supplement (PMC9881769; doi:10.3201/eid2902.220765), 2023-02
Supplement: 22-0765-Techapp-s1.pdf [file 22-0765-Techapp-s1.pdf]

# Combined Phylogeographic Analyses and Epidemiologic Contact Tracing to Characterize Atypically Pathogenic Avian Influenza (H3N1) Epidemic, Belgium, 2019

## Appendix

### Additional Methods

#### Case Definition by Virological Testing

A case (outbreak) was defined as a farm that had animals infected with avian influenza virus (AIV) subtype H3N1, confirmed by virological testing. Swab and organ samples were received from the field or collected from cadavers and submitted for analysis. We performed sample pretreatment, virus RNA extraction, and AIV detection by real-time reverse transcription PCR (RT-PCR) targeting conserved influenza A matrix gene sequences (*I*) and specific H3 and N1 subtype detection (2,3) as previously described (*I–3*). We isolated viruses from AIV-positive samples by inoculating specific pathogen-free day 9 embryonated chicken eggs and passaging after 5 days by using standard procedures (*4*).

#### Collection of Epidemiologic Data

We collected data on 62 of 82 affected farms by using individual semi-structured questionnaires about disease emergence (date of symptom onset and symptomatology) and consecutively adopted biosecurity measures at each farm. We encoded additional information from pictures, production sheets, and handwritten documents in a harmonized format. Cadaver transport records including truck travel sheets were provided by the animal cadaver collection company (Rendac, <https://www.rendac.com>). We included zootechnical information (animal species, production type, daily mortality, food and water intake, circadian light cycles, weight, and age), clinical features (associated with onset date), and contact tracing information (farm visits by veterinarians, family links, feed delivery, eggs, cadavers and manure collection, and

slaughterhouse and hatchery links). We extracted identification, geographic localization coordinates (longitude and latitude), and animal registration data (including transport of live animals) from the national livestock sanitary database SANITEL (<https://prd.sanitel.be>; Sanitel.Net–PRD 21.6.5.0 © 2007 FAVV/AFSCA, accession date: Aug 31, 2020). The extracted information enabled assignment of samples to different production units or barns within a farm. We analyzed common professional contacts between farms (feed/manure/cadaver trucks, veterinarians, hatcheries, slaughterhouses, technicians) and constructed professional networks between operators. We considered potential transmission networks accountable when animals, transport vehicles, or visitors went from an infectious to a susceptible farm on the same day, within an infectious period of  $\leq 7$  days before and after symptom onset (determined by the farmer). We separated the identified plausible transmission networks into 2 categories: transport contact networks, comprising farms connected through commercial movement of a vehicle (1 specific time on 1 specific day); and social contact networks, comprising farms linked through social connections occurring several times during the infectious period (such as family or neighbor visits). We analyzed hourly and daily records of wind directions and speeds from August 1, 2018, through July 31, 2019, from two synoptic weather stations situated close to the outbreak areas in Beitem and Melle, Belgium.

#### **AIV Whole-Genome Sequencing**

We extracted virus RNA from clinical samples (either swabs suspended in medium or 10% wt/vol homogenized tissue samples or pooled tissues) or virus isolates by using the Macherey-Nagel Nucleospin RNA virus kit (<https://www.mn-net.com>) and 4  $\mu$ L of GenElute-LPA synthetic carrier (Sigma, <https://www.sigmaaldrich.com>) instead of the kit-supplied polyA carrier RNA. We performed real-time quantitative RT-PCR of the influenza virus matrix gene to verify viral RNA yield. We amplified cDNA of all influenza A segments simultaneously by using 1 pair of influenza-specific primers that anneal to the conserved 3' and 5' segment ends (5, with modifications): MTBuni-12DEG (5'-ACGCGTGATCAGCRAAAGCAGG-3') and MTBuni-13 (5'-ACGCGTGATCAGTAGAAACA AGG-3'). We performed RT-PCR with each primer at a final concentration of 0.2 mM, 5  $\mu$ L of RNA, and Invitrogen Superscript III One-Step RT-PCR System with Platinum Taq DNA Polymerase (Thermo Fisher Scientific, <https://www.thermofisher.com>). We denatured viral RNA plus primers for 2 min at 95°C, cooled on ice, and then added Superscript III One-Step RT-PCR reagents according to the

manufacturer's instructions in a final reaction volume of 50  $\mu$ L. PCR cycling conditions were: initial primary reverse transcription step of 60 min at 55°C; then denaturation at 94°C for 2 min; followed by 5 cycles of 94°C for 30 s, 45°C for 30 s, and 68°C for 4 min; an additional 31 cycles of 94°C for 30 s, 57°C for 30 s, and 68°C for 4 min; and a final elongation step at 68°C for 5 min. We visualized amplicon length on a 1% agarose gel. We purified RT-PCR amplicons by using AMPure XP Magnetic Beads (Beckman Coulter, <https://www.beckmancoulter.com>) in a ratio of 0.65 sample volume to bead volume and determined concentration fluorometrically by using a QuantiFluor® dsDNA System on a Quantus Fluorometer (Promega, <https://www.promega.com>).

We generated sequencing libraries from 1 ng of influenza A amplicons by using the Nextera XT kit (Illumina, <https://www.illumina.com>) and standard Nextera XT indices. We quantified the libraries by using a KAPA Library Quantification Kit (Roche Diagnostics, <https://www.roche.com>) and then pooled them equimolarly. We sequenced the libraries by using MiSeq Reagent Kit v3 (Illumina) with 2  $\times$  300-bp paired-end sequencing according to the manufacturer's instructions, aiming for  $\geq 0.5$  million read pairs per sample.

We trimmed demultiplexed \*.fastq next generation sequencing reads by using Trimmomatic v0.38 (6) to remove adaptor sequences and low quality bases (using the ILLUMINACLIP 2:30:10, SLIDING WINDOW:4:20, and MINLEN:50 settings). Only paired reads were retained for further analysis. We mapped quality trimmed data to GenBank reference sequences (accession nos. MN006980–7) that included 8 segments of the epidemic index case (7) by using Bowtie2 v2.3.4.3 (using `–very-sensitive-local`, `-I 100 -X 750 –no-mixed –no-discordant` settings; <https://bowtie-bio.sourceforge.net/bowtie2/index.shtml>). Reads with a minimal clip length of 5 were removed by using SamJdk v966d3dfb7 (<http://lindenb.github.io/jvarkit/SamJdk.html>). Nucleotide variants were called using the GATK Best Practices pipeline v4.1.3.0 (<https://github.com/broadinstitute/gatk>).

### **Preliminary Phylogenetic Analysis of Hemagglutinin Segments**

To determine whether the 2019 outbreak originated from a single introduction event in the study area, we performed a preliminary maximum likelihood phylogenetic analysis to assess the monophyletic status of the clade that included all sequences from Belgium. We used IQ-TREE 2.0.3 (8) and a GTR (general time-reversible) model of nucleotide substitution with

empirical base frequencies and 4 free site rate categories and performed 200 bootstrap calculations to assess internal branch support. The analysis was based on the hemagglutinin gene segments of all sequences from Belgium generated in the present study and 80 H3Nx hemagglutinin segments from outside of Belgium that were selected to represent diversity of H3Nx viruses circulating in Eurasia before the 2019 H3N1 virus introduction in Belgium.

### **Spatially-Explicit Phylogeographic Reconstruction**

We aligned the 104 concatenated H3N1 virus genomes by using MAFFT v7.310 (9). Regions without coverage were masked. For each concatenated genome, we included geographic coordinates of the affected farm, farm and production unit identification, and the sampling date of the original clinical sample used in the metadata. We assessed the phylogenetic temporal signal by performing a regression of root-to-tip genetic distances against sequence sampling times by using the program TempEst (10) ( $R^2 = 0.32$ ) and a maximum likelihood tree generated by using the program SeaView v5.0.5 (11). We assessed the absence of a signal for recombination by using the  $\Phi$ -test (12) implemented in the program SplitsTree 4 (13).

For the spatially-explicit phylogeographic reconstruction of H3N1 lineages during the epidemic in Belgium, we used the relaxed random walk diffusion model (14–16) implemented in the software package BEAST 1.10 (17). This model enables a joint inference of time-calibrated phylogenetic trees and a continuous character mapping of the longitude and latitude at the internal nodes of the trees. We specified a GTR+ $\Gamma$  substitution model, lognormal relaxed molecular clock model, skygrid coalescent tree prior, and relaxed random walk diffusion model with a gamma distribution to model the among-branch heterogeneity in dispersal velocity. Because the continuous diffusion model does not permit analysis of samples associated with exact same sampling coordinates, we added a 2 km jitter window to tips sharing identical sampling coordinates. The Markov chain Monte-Carlo algorithm was run for  $10^9$  generations and parameters were logged every  $10^5$  generations. After verifying that the estimated sampling size values were all  $>200$ , we identified and annotated the maximum clade credibility tree (MCC) by using TreeAnnotator 1.10 after having discarded 10% of sampled trees as burn-in. We used the “seraphim” R package (18,19) to extract spatiotemporal information embedded in 1,000 posterior trees and to exploit those extractions to estimate the evolution of the weighted lineage dispersal velocity through time and visualize the inferred dispersal history of H3N1 lineages. The

same 1,000 trees sampled from the posterior distribution were used for different post hoc analyses.

We performed an exploratory phylogenetic analysis to remove sequences so that monophyletic clusters of sequences sampled from the same farm were represented only by a single sequence. Those monophyletic clusters largely represent within-farm dispersal, which is characterized by noise because of the jitter used to differentiate the geographic coordinates associated with sequences from the same sampling location (20). The exploratory analysis was also performed in BEAST 1.10 by using the same substitution, molecular clock, and coalescent models outlined previously. Using this procedure, only 3 sequences were discarded, and the final dataset included 101 sequences.

### **Investigating Potential Drivers of Virus Spread**

To investigate the effect of wind direction on H3N1 lineage dispersal, we compared wind direction data with dispersal directions of lineages inferred through our phylogeographic analysis and with dispersal direction of the same lineages in a null dispersal model. The null dispersal model was obtained by randomizing the geographic position of phylogenetic branches while conserving tree topology (connections among branches) and position inferred for the most ancestral node of the tree. Randomization within the study area was constrained, which was defined by the minimum convex hull polygon encompassing the position of internal and tip nodes from the 1,000 trees sampled from the posterior distribution (19). For each phylogenetic branch (whose position was inferred or randomized in the study area), we then computed the angle between the dispersal direction and wind direction corresponding to the time window of the considered branch. For a specific branch, wind direction was obtained by averaging daily wind directions recorded at two meteorological stations located within the study area (Figure 1, main text) that corresponded to the time window of the considered branch. For each tree, we computed the mean angle  $A$  between lineage and wind direction. Each inferred  $A$  value ( $A_{\text{inferred}}$ ) was then compared with its corresponding randomized value ( $A_{\text{randomized}}$ ) by approximating Bayes factor (BF) support as follows:  $\text{BF} = [p_A / (1 - p_A)] / [0.5 / (1 - 0.5)]$ , where  $p_A$  is the posterior probability that  $A_{\text{randomized}}$  is  $> A_{\text{inferred}}$  in samples from the posterior distribution (i.e., the frequency at which  $A_{\text{randomized}}$  is  $> A_{\text{inferred}}$  in the samples from the posterior distribution). The prior odds was 1 because we assumed an equal prior expectation for  $A_{\text{inferred}}$  and  $A_{\text{randomized}}$  (21,22). We tested the hypothesis that wind direction had greater correlation with inferred than

randomized dispersal direction for viral lineages. BF support levels were interpreted as previously described (23); a BF of  $3 < \text{BF} < 20$  indicated positive support, and a BF  $> 20$  or BF  $\gg 20$  was strong support. We performed this test using different time periods (Figure 2, main text) and different geographic distance cutoff values (1, 2, 5, and 10 km) to determine which phylogenetic branches to include in the analysis. The 4 time periods were delineated by key events and decisions made during the epidemic, including key dates of human activity and behavior toward avian influenza biosecurity measures. The end of period 1 (August 1, 2018, through April 5, 2019) was defined by the onset of symptoms when the virus reemerged at the index farm on April 5, 2019. The end of period 2 (April 6, 2019, through April 26, 2019) was defined by the increased attention of field operators (transporters, farmers, veterinarians, feed transport, and rendering activity) to biosecurity that began on April 26, 2019, because of increased awareness of the H3N1 epidemic. The end of period 3 (April 27, 2019, through May 16, 2019) was defined by the implementation of the first official measures through ministerial decree on May 16, 2019, emphasizing reinforced passive surveillance, cleaning and disinfection of all vehicles entering or leaving a farm, one-on-one transport of poultry, restricted access to poultry farms and hatcheries by staff, farm veterinarians, or authorities' delegates, and disinfection of manure. The end of period 4 (May 17, 2019, through July 11, 2019) was defined by the last date a virus-positive sample was detected on July 11, 2019.

We used a Bayesian approach (24) to assess the phylogenetic signal associated with 3 categorical epidemiologic covariates attributed to virus source farms during the epidemic: spatiotemporal clusters determined by SaTScan software (<https://www.SaTScan.org>), transport contact networks (including feed delivery, manure and cadaver collection, and live animal transport) and social contact networks (same veterinarian, family, or neighbors). We used the 1,000 trees sampled from the posterior distribution and phytools from the R software package (The R Project for Statistical Computing, <https://www.r-project.org>) to estimate the Blomberg  $K$  statistic. The  $K$  statistic measures the phylogenetic signal of a covariate by comparing the observed signal in this covariate to the signal under a Brownian motion model of trait evolution on a phylogeny (25,26). For each covariate and tree sampled from the posterior distribution, we estimated 2  $K$  values: 1 value derived from original covariate values that produced  $K_{\text{inferred}}$  and the other value derived from covariate values permuted among tips that produced  $K_{\text{null}}$ . Of note, permutations of covariate values were only performed among tips for which a covariate value

was initially available. The statistical support associated with  $K_{\text{inferred}}$  distribution was evaluated by comparing with its corresponding  $K_{\text{null}}$  distribution and formalized by approximating a BF value. Specifically, the BF support associated with  $K$  was approximated by the posterior odds that  $K_{\text{inferred}}$  was  $>K_{\text{null}}$  divided by the equivalent prior probability odds (the prior probability for  $K_{\text{inferred}}>K_{\text{null}}$  was considered to be 0.5):  $\text{BF} = [p_K/(1-p_K)]/[0.5/(1-0.5)]$ , where  $p_K$  is the posterior probability that  $K_{\text{inferred}}$  was  $>K_{\text{null}}$  in the samples from the posterior distribution. The prior odds was 1 because we assumed an equal prior expectation for  $K_{\text{inferred}}$  and  $K_{\text{null}}$  (21,22). BF support levels were interpreted as previously described (27).

## References

1. Van Borm S, Steensels M, Ferreira HL, Boschmans M, De Vriese J, Lambrecht B, et al. A universal avian endogenous real-time reverse transcriptase-polymerase chain reaction control and its application to avian influenza diagnosis and quantification. *Avian Dis.* 2007;51:213–20. [PubMed https://doi.org/10.1637/7552-033106R.1](https://doi.org/10.1637/7552-033106R.1)
2. Payungporn S, Chutinimitkul S, Chaisingh A, Damrongwantanapokin S, Buranathai C, Amonsin A, et al. Single step multiplex real-time RT-PCR for H5N1 influenza A virus detection. *J Virol Methods.* 2006;131:143–7. [PubMed https://doi.org/10.1016/j.jviromet.2005.08.004](https://doi.org/10.1016/j.jviromet.2005.08.004)
3. Hoffmann B, Hoffmann D, Henritzi D, Beer M, Harder TC. Riems influenza a typing array (RITA): an RT-qPCR-based low density array for subtyping avian and mammalian influenza a viruses. *Sci Rep.* 2016;6:27211. [PubMed https://doi.org/10.1038/srep27211](https://doi.org/10.1038/srep27211)
4. World Organisation for Animal Health. Manual of diagnostic tests and vaccines for terrestrial animals. Avian influenza (including infection with high pathogenicity avian influenza viruses). 2021 [cited 2022 Mar 15]. <https://www.oie.int/en/what-we-do/standards/codes-and-manuals/terrestrial-manual-online-access>
5. Hoffmann E, Stech J, Guan Y, Webster RG, Perez DR. Universal primer set for the full-length amplification of all influenza A viruses. *Arch Virol.* 2001;146:2275–89. [PubMed https://doi.org/10.1007/s007050170002](https://doi.org/10.1007/s007050170002)
6. Bolger AM, Lohse M, Usadel B. Trimmomatic: a flexible trimmer for Illumina sequence data. *Bioinformatics.* 2014;30:2114–20. [PubMed https://doi.org/10.1093/bioinformatics/btu170](https://doi.org/10.1093/bioinformatics/btu170)

7. Steensels M, Gelaude P, Van Borm S, Van Den Berg T, Cargnel M, Roupie V, et al. Atypical pathogenicity of avian influenza (H3N1) virus involved in outbreak, Belgium, 2019. *Emerg Infect Dis.* 2020;26:1899–903. [PubMed https://doi.org/10.3201/eid2608.191338](https://doi.org/10.3201/eid2608.191338)
8. Minh BQ, Schmidt HA, Chernomor O, Schrempf D, Woodhams MD, von Haeseler A, et al. IQ-TREE 2: new models and efficient methods for phylogenetic inference in the genomic era. *Mol Biol Evol.* 2020;37:1530–4. [PubMed https://doi.org/10.1093/molbev/msaa015](https://doi.org/10.1093/molbev/msaa015)
9. Katoh K, Standley DM. MAFFT multiple sequence alignment software version 7: improvements in performance and usability. *Mol Biol Evol.* 2013;30:772–80. [PubMed https://doi.org/10.1093/molbev/mst010](https://doi.org/10.1093/molbev/mst010)
10. Rambaut A, Lam TT, Max Carvalho L, Pybus OG. Exploring the temporal structure of heterochronous sequences using TempEst (formerly Path-O-Gen). *Virus Evol.* 2016;2:vew007. [PubMed https://doi.org/10.1093/ve/vew007](https://doi.org/10.1093/ve/vew007)
11. Gouy M, Guindon S, Gascuel O. SeaView version 4: a multiplatform graphical user interface for sequence alignment and phylogenetic tree building. *Mol Biol Evol.* 2010;27:221–4. [PubMed https://doi.org/10.1093/molbev/msp259](https://doi.org/10.1093/molbev/msp259)
12. Bruen TC, Philippe H, Bryant D. A simple and robust statistical test for detecting the presence of recombination. *Genetics.* 2006;172:2665–81. [PubMed https://doi.org/10.1534/genetics.105.048975](https://doi.org/10.1534/genetics.105.048975)
13. Huson DH. SplitsTree: analyzing and visualizing evolutionary data. *Bioinformatics.* 1998;14:68–73. [PubMed https://doi.org/10.1093/bioinformatics/14.1.68](https://doi.org/10.1093/bioinformatics/14.1.68)
14. Dellicour S, Lemey P, Artois J, Lam TT, Fusaro A, Monne I, et al. Incorporating heterogeneous sampling probabilities in continuous phylogeographic inference—application to H5N1 spread in the Mekong region. *Bioinformatics.* 2020;36:2098–104. [PubMed https://doi.org/10.1093/bioinformatics/btz882](https://doi.org/10.1093/bioinformatics/btz882)
15. Lemey P, Rambaut A, Welch JJ, Suchard MA. Phylogeography takes a relaxed random walk in continuous space and time. *Mol Biol Evol.* 2010;27:1877–85. [PubMed https://doi.org/10.1093/molbev/msq067](https://doi.org/10.1093/molbev/msq067)
16. Pybus OG, Suchard MA, Lemey P, Bernardin FJ, Rambaut A, Crawford FW, et al. Unifying the spatial epidemiology and molecular evolution of emerging epidemics. *Proc Natl Acad Sci USA.* 2012;109:15066–71. [PubMed https://doi.org/10.1073/pnas.1206598109](https://doi.org/10.1073/pnas.1206598109)



17. Suchard MA, Lemey P, Baele G, Ayres DL, Drummond AJ, Rambaut A. Bayesian phylogenetic and phylodynamic data integration using BEAST 1.10. *Virus Evol.* 2018;4:vey016. [PubMed](#)  
<https://doi.org/10.1093/ve/vey016>
18. Dellicour S, Rose R, Faria NR, Lemey P, Pybus OG. SERAPHIM: studying environmental rasters and phylogenetically informed movements. *Bioinformatics.* 2016;32:3204–6. [PubMed](#)  
<https://doi.org/10.1093/bioinformatics/btw384>
19. Dellicour S, Rose R, Pybus OG. Explaining the geographic spread of emerging epidemics: a framework for comparing viral phylogenies and environmental landscape data. *BMC Bioinformatics.* 2016;17:82. [PubMed](#) <https://doi.org/10.1186/s12859-016-0924-x>
20. Dellicour S, Baele G, Dudas G, Faria NR, Pybus OG, Suchard MA, et al. Phylodynamic assessment of intervention strategies for the West African Ebola virus outbreak. *Nat Commun.* 2018;9:2222. [PubMed](#) <https://doi.org/10.1038/s41467-018-03763-2>
21. Suchard MA, Weiss RE, Sinsheimer JS. Models for estimating bayes factors with applications to phylogeny and tests of monophyly. *Biometrics.* 2005;61:665–73. [PubMed](#)  
<https://doi.org/10.1111/j.1541-0420.2005.00352.x>
22. Dellicour S, Rose R, Faria NR, Vieira LFP, Bourhy H, Gilbert M, et al. Using viral gene sequences to compare and explain the heterogeneous spatial dynamics of virus epidemics. *Mol Biol Evol.* 2017;34:2563–71. [PubMed](#) <https://doi.org/10.1093/molbev/msx176>
23. Kass RE, Raftery AE. Bayes factors. *J Am Stat Assoc.* 1995;90:773–95.  
<https://doi.org/10.1080/01621459.1995.10476572>
24. Martinet B, Dellicour S, Ghisbain G, Przybyla K, Zambra E, Lecocq T, et al. Global effects of extreme temperatures on wild bumblebees. *Conserv Biol.* 2021;35:1507–18. [PubMed](#)  
<https://doi.org/10.1111/cobi.13685>
25. Blomberg SP, Garland T Jr, Ives AR. Testing for phylogenetic signal in comparative data: behavioral traits are more labile. *Evolution.* 2003;57:717–45. [PubMed](#) <https://doi.org/10.1111/j.0014-3820.2003.tb00285.x>
26. Revell LJ. A comment on the use of stochastic character maps to estimate evolutionary rate variation in a continuously valued trait. *Syst Biol.* 2013;62:339–45. [PubMed](#)  
<https://doi.org/10.1093/sysbio/sys084>
27. Lee MD, Wagenmakers E-J. Bayesian cognitive modeling: a practical course. Cambridge: Cambridge University Press; 2014.

**Appendix Table 1.** Farm-to-farm contact tracing in study combining phylogeographic analyses and epidemiologic contact tracing to characterize atypically pathogenic H3N1 avian influenza epidemic, Belgium, 2019\*

| Contact type           | Definition                                                                             | Hypothesis                                                                                                                                                  | No. contacts | Remarks                                                                                                                                                           |
|------------------------|----------------------------------------------------------------------------------------|-------------------------------------------------------------------------------------------------------------------------------------------------------------|--------------|-------------------------------------------------------------------------------------------------------------------------------------------------------------------|
| <b>Transport</b>       |                                                                                        |                                                                                                                                                             |              |                                                                                                                                                                   |
| Live animals           | Movement of live animals between farms during the AIV infectious period                | Poultry were infected during transport or by introducing infected animals to the flock.                                                                     | 1            | (Hatching) eggs not included in the definition of live animals                                                                                                    |
| Feed                   | Feed delivery to different poultry facilities on the same day                          | Virus introduction was through transport trucks without proper cleaning and disinfection (including wheels, driver's boots, equipment)                      | 8            | Starting on April 24, 2019, members of the Belgian Feed Association were encouraged to apply a higher level of biosecurity<br>Usually only 1 farm visited per day |
| Manure                 | Collection of manure in $\geq 1$ farm and delivery to the manure processing unit       | disinfection (including wheels, driver's boots, equipment)                                                                                                  | 0            |                                                                                                                                                                   |
| Cadavers               | Collection of cadavers in several poultry farms on the same day and the same itinerary | that visited an infected farm on a given day.                                                                                                               | 4            | Beginning on April 23, 2019, affected facilities were visited at the end of the day                                                                               |
| <b>Social networks</b> |                                                                                        |                                                                                                                                                             |              |                                                                                                                                                                   |
| Veterinarians          | Visited 2 different farms on the same day                                              | People visited a susceptible flock after visiting an infected flock, and their vehicles and equipment potentially acted as mechanical vectors to spread AIV | 8            | NA                                                                                                                                                                |
| Same owner             | >1 farm owned by the same person                                                       |                                                                                                                                                             | 7            | NA                                                                                                                                                                |
| Family                 | Different farms owned by relatives known to interact through visits, animals, or feed  |                                                                                                                                                             | 16           | NA                                                                                                                                                                |

\*AIV infectious period was defined as  $\leq 7$  days before and after the onset of symptoms reported by the farmer. AIV, avian influenza virus; NA, not applicable.

**Appendix Table 2.** Sample identification, metadata, and sequence accession numbers of sequenced avian influenza virus genomes in study combining phylogeographic analyses and epidemiologic contact tracing to characterize atypically pathogenic H3N1 avian influenza epidemic, Belgium, 2019\*

| Accession nos.†           | SeqID‡     | Strain name                                  | Outbreak no. | Province | Production unit | Production type      | Sample date (dd/mm/yyyy) | Sample type                                  |
|---------------------------|------------|----------------------------------------------|--------------|----------|-----------------|----------------------|--------------------------|----------------------------------------------|
| MN006980.1–<br>MN006987.1 | 1–1-iPTL   | A/Gallus gallus/Belgium/3497_0001/2019(H3N1) | 1            | WVL      | 1               | Layers-<br>outdoor   | 6/04/2019                | Isolate (pooled lung +<br>trachea)           |
| EPI_ISL_3914869           | 0–1-PTL    | A/Gallus gallus/Belgium/609_0001/2019(H3N1)  | 0            | WVL      | 1               | Layers-<br>outdoor   | 18/01/2019               | Pooled lung + trachea                        |
| EPI_ISL_3914870           | 2–1-iPTL   | A/Gallus gallus/Belgium/3912_0001/2019(H3N1) | 2            | WVL      | 1               | Breeders-<br>broiler | 17/04/2019               | Isolate (pooled lung +<br>trachea)           |
| EPI_ISL_3914871           | 2–1-PTL-2  | A/Gallus gallus/Belgium/3945_0002/2019(H3N1) | 2            | WVL      | 1               | Breeders-<br>broiler | 17/04/2019               | Pooled lung + trachea                        |
| EPI_ISL_3914872           | 3–1-PTS    | A/Gallus gallus/Belgium/4396_0001/2019(H3N1) | 3            | WVL      | 3               | Breeders-<br>broiler | 26/04/2019               | Pool of 5 tracheal swabs<br>maximum          |
| EPI_ISL_3914873           | 4–1-iPTL   | A/Gallus gallus/Belgium/3953/2019(H3N1)      | 4            | WVL      | 1               | Breeders-<br>broiler | 17/04/2019               | Isolate (pooled lung +<br>trachea)           |
| EPI_ISL_3914874           | 4–1-PTL-2  | A/Gallus gallus/Belgium/4325_0001/2019(H3N1) | 4            | WVL      | 1               | Breeders-<br>broiler | 30/04/2019               | Pooled lung + trachea                        |
| EPI_ISL_3914875           | 5–1-PCS    | A/Gallus gallus/Belgium/3978_0001/2019(H3N1) | 5            | WVL      | 1               | Layers-<br>outdoor   | 18/04/2019               | Pool of 5 cloacal swabs<br>maximum           |
| EPI_ISL_3914876           | 6–1-iPTL   | A/Gallus gallus/Belgium/4010/2019(H3N1)      | 6            | WVL      | 1               | Layers-<br>outdoor   | 23/04/2019               | Isolate (pooled lung +<br>trachea)           |
| EPI_ISL_3914877           | 7–1-iBOW   | A/Gallus gallus/Belgium/4008/2019(H3N1)      | 7            | WVL      | 1               | Breeders-<br>broiler | 21/04/2019               | Intestine                                    |
| EPI_ISL_3914878           | 8–1-PCS    | A/Gallus gallus/Belgium/4070_0001/2019(H3N1) | 8            | WVL      | 1               | Layers               | 22/04/2019               | Pool of 5 cloacal swabs<br>maximum           |
| EPI_ISL_3914879           | 8–3-PCS    | A/Gallus gallus/Belgium/4581_0002/2019(H3N1) | 8            | WVL      | 3               | Layers               | 7/05/2019                | Pool of 5 cloacal swabs<br>maximum           |
| EPI_ISL_3914880           | 9–2-BOW    | A/Gallus gallus/Belgium/4226_0001/2019(H3N1) | 9            | WVL      | 2               | Breeders-<br>broiler | 26/04/2019               | Intestine                                    |
| EPI_ISL_3914881           | 11–1-PLT   | A/Gallus gallus/Belgium/4327_0001/2019(H3N1) | 11           | WVL      | 1               | Layers-<br>outdoor   | 30/04/2019               | Pooled lung + trachea                        |
| EPI_ISL_3914882           | 11–1-POO   | A/Gallus gallus/Belgium/4849_0001/2019(H3N1) | 11           | WVL      | 1               | Layers-<br>outdoor   | 13/05/2019               | Pooled lung + trachea +<br>intestine + brain |
| EPI_ISL_3914883           | 11–4-POO   | A/Gallus gallus/Belgium/4849_0004/2019(H3N1) | 11           | WVL      | 4               | Layers-<br>outdoor   | 13/05/2019               | Pooled lung + trachea +<br>intestine + brain |
| EPI_ISL_3914884           | 12–1-iBOW  | A/Gallus gallus/Belgium/4328_0005/2019(H3N1) | 12           | WVL      | 1               | Breeders-<br>broiler | 30/04/2019               | Intestine                                    |
| EPI_ISL_3915374           | 13–4-iBOW  | A/Gallus gallus/Belgium/4395_007/2019(H3N1)  | 13           | WVL      | 4               | Layers-<br>outdoor   | 2/05/2019                | Intestine                                    |
| EPI_ISL_3914885           | 13–5-BOW   | A/Gallus gallus/Belgium/4395_009/2019(H3N1)  | 13           | WVL      | 5               | Layers-<br>outdoor   | 2/05/2019                | Intestine                                    |
| EPI_ISL_3914886           | 14–1-PTL   | A/Gallus gallus/Belgium/4393_0001/2019(H3N1) | 14           | WVL      | 1               | Layers-<br>outdoor   | 2/05/2019                | Pooled lung + trachea                        |
| EPI_ISL_3914887           | 14–1-iBOW  | A/Gallus gallus/Belgium/4393_0002/2019(H3N1) | 14           | WVL      | 1               | Layers-<br>outdoor   | 2/05/2019                | Isolate (intestine)                          |
| EPI_ISL_3914888           | 14–3-PTS-1 | A/Gallus gallus/Belgium/4491_0005/2019(H3N1) | 14           | WVL      | 3               | Layers-<br>outdoor   | 3/05/2019                | Pool of 5 tracheal swabs<br>maximum          |
| EPI_ISL_3915373           | 14–3-PTS-2 | A/Gallus gallus/Belgium/4491_0006/2019(H3N1) | 14           | WVL      | 3               | Layers-<br>outdoor   | 3/05/2019                | Pool of 5 tracheal swabs<br>maximum          |

| Accession nos.† | SeqID‡    | Strain name                                  | Outbreak no. | Province | Production unit | Production type         | Sample date (dd/mm/yyyy) | Sample type                                         |
|-----------------|-----------|----------------------------------------------|--------------|----------|-----------------|-------------------------|--------------------------|-----------------------------------------------------|
| EPI_ISL_3914889 | 15-1-IBRA | A/Gallus gallus/Belgium/4452_0002/2019(H3N1) | 15           | WVL      | 1               | Breeders-broiler        | 3/05/2019                | Isolate (brain)                                     |
| EPI_ISL_3914890 | 16-1-POO  | A/Turkey/Belgium/4771_0001/2019(H3N1)        | 16           | WVL      | 1               | Broiler-turkey          | 10/05/2019               | Pooled lung + trachea + intestine + brain           |
| EPI_ISL_3914891 | 16-1-BOW  | A/Turkey/Belgium/4453_0002/2019(H3N1)        | 16           | WVL      | 1               | Broiler-turkey          | 3/05/2019                | Intestine                                           |
| EPI_ISL_3914892 | 17-1-POO  | A/Turkey/Belgium/4712_0001/2019(H3N1)        | 17           | WVL      | 1               | Broiler-turkey          | 9/05/2019                | Pooled lung + trachea + intestine + brain           |
| EPI_ISL_3914893 | 19-2-PCS  | A/Gallus gallus/Belgium/4735_0002/2019(H3N1) | 19           | WVL      | 2               | Breeders-broiler        | 9/05/2019                | Pool of 5 cloacal swabs maximum                     |
| EPI_ISL_3914894 | 19-1-PCS  | A/Gallus gallus/Belgium/4428_0001/2019(H3N1) | 19           | WVL      | 1               | Breeders-broiler        | 2/05/2019                | Pool of 5 cloacal swabs maximum                     |
| EPI_ISL_3914895 | 20-1-PCS  | A/Gallus gallus/Belgium/4464_0001/2019(H3N1) | 20           | WVL      | 1               | Breeders-broiler        | 3/05/2019                | Pool of 5 cloacal swabs maximum                     |
| EPI_ISL_3914896 | 21-3-PTL  | A/Gallus gallus/Belgium/4468_0006/2019(H3N1) | 21           | WVL      | 3               | Breeders-broiler        | 3/05/2019                | Pooled lung + trachea                               |
| EPI_ISL_3914897 | 21-1-POO  | A/Gallus gallus/Belgium/4888_0001/2019(H3N1) | 21           | WVL      | 1               | Breeders-broiler        | 14/05/2019               | Pooled lung + trachea + intestine + brain + oviduct |
| EPI_ISL_3914898 | 21-2-POO  | A/Gallus gallus/Belgium/4888_0002/2019(H3N1) | 21           | WVL      | 2               | Breeders-broiler        | 14/05/2019               | Pooled lung + trachea + intestine + brain + oviduct |
| EPI_ISL_3914899 | 22-6-PCS  | A/Turkey/Belgium/4462_0001/2019(H3N1)        | 22           | WVL      | 6               | Breeders-broiler-turkey | 3/05/2019                | Pool of 5 cloacal swabs maximum                     |
| EPI_ISL_3914900 | 22-4-PTS  | A/Turkey/Belgium/5953_0003/2019(H3N1)        | 22           | WVL      | 4               | Breeders-broiler-turkey | 7/06/2019                | Pool of 5 tracheal swabs maximum                    |
| EPI_ISL_3915375 | 23-2-PCS  | A/Gallus gallus/Belgium/4766_0002/2019(H3N1) | 23           | WVL      | 2               | Breeders-broiler        | 10/05/2019               | Pool of max 5 cloacal swabs                         |
| EPI_ISL_3914901 | 23-1-PCS  | A/Gallus gallus/Belgium/4767_0002/2019(H3N1) | 23           | WVL      | 1               | Breeders-broiler        | 4/05/2019                | Pool of 5 cloacal swabs maximum                     |
| EPI_ISL_3914903 | 24-2-POO  | A/Gallus gallus/Belgium/5228_0001/2019(H3N1) | 24           | WVL      | 2               | Layers                  | 20/05/2019               | Pooled lung + trachea + intestine + brain           |
| EPI_ISL_3914914 | 24-3-POO  | A/Gallus gallus/Belgium/5228_0002/2019(H3N1) | 24           | WVL      | 3               | Layers                  | 20/05/2019               | Pooled lung + trachea + intestine + brain           |
| EPI_ISL_3914926 | 24-4-POO  | A/Gallus gallus/Belgium/5228_0003/2019(H3N1) | 24           | WVL      | 4               | Layers                  | 20/05/2019               | Pooled lung + trachea + intestine + brain           |
| EPI_ISL_3914934 | 24-1-PCS  | A/Gallus gallus/Belgium/4458_0001/2019(H3N1) | 24           | WVL      | 1               | Layers                  | 4/05/2019                | Pool of 5 cloacal swabs maximum                     |
| EPI_ISL_3914938 | 26-1-POO  | A/Gallus gallus/Belgium/4525_0001/2019(H3N1) | 26           | WVL      | 1               | Layers                  | 6/05/2019                | Pooled lung + trachea + intestine                   |
| EPI_ISL_3914941 | 27-2-POO  | A/Gallus gallus/Belgium/4759_0001/2019(H3N1) | 27           | WVL      | 2               | Layers                  | 10/05/2019               | Pooled lung + trachea + intestine + brain           |
| EPI_ISL_3914949 | 27-8-PTLB | A/Gallus gallus/Belgium/4538_0001/2019(H3N1) | 27           | WVL      | 8               | Layers                  | 6/05/2019                | Pooled lung + trachea + intestine                   |
| EPI_ISL_3914953 | 28-2-PCS  | A/Gallus gallus/Belgium/4492_0002/2019(H3N1) | 28           | OVL      | 2               | Layers-outdoor          | 5/05/2019                | Pool of 5 cloacal swabs maximum                     |
| EPI_ISL_3914955 | 29-2-PTS  | A/Turkey/Belgium/4539_0001/2019(H3N1)        | 29           | WVL      | 2               | Broiler-turkey          | 5/05/2019                | Pool of 5 tracheal swabs maximum                    |

| Accession nos.† | SeqID‡   | Strain name                                  | Outbreak no. | Province | Production unit | Production type  | Sample date (dd/mm/yyyy) | Sample type                               |
|-----------------|----------|----------------------------------------------|--------------|----------|-----------------|------------------|--------------------------|-------------------------------------------|
| EPI_ISL_3914967 | 30-2-PCS | A/Gallus gallus/Belgium/5347_0002/2019(H3N1) | 30           | WVL      | HOK 2           | Layers           | 22/5/2019                | Pool of 5 cloacal swabs maximum           |
| EPI_ISL_3914978 | 30-1-PCS | A/Gallus gallus/Belgium/4543_0001/2019(H3N1) | 30           | WVL      | 1               | Layers           | 6/05/2019                | Pool of 5 cloacal swabs maximum           |
| EPI_ISL_3914990 | 31-2-POO | A/Gallus gallus/Belgium/5055_0002/2019(H3N1) | 31           | WVL      | 2               | Breeders-broiler | 17/05/2019               | Pooled lung + trachea + intestine + brain |
| EPI_ISL_3915000 | 31-3-POO | A/Gallus gallus/Belgium/5055_0003/2019(H3N1) | 31           | WVL      | 3               | Breeders-broiler | 17/05/2019               | Pooled lung + trachea + intestine + brain |
| EPI_ISL_3915012 | 31-E-POO | A/Gallus gallus/Belgium/4633_0001/2019(H3N1) | 31           | WVL      | HOK E           | Breeders-broiler | 8/05/2019                | Pooled lung + trachea + intestine + brain |
| EPI_ISL_3915025 | 32-1-PCS | A/Gallus gallus/Belgium/4732_0002/2019(H3N1) | 32           | WVL      | 1               | Layers-outdoor   | 9/05/2019                | Pool of 5 cloacal swabs maximum           |
| EPI_ISL_3915037 | 33-1-PCS | A/Gallus gallus/Belgium/4852_0001/2019(H3N1) | 33           | WVL      | 3               | Breeders-layers  | 13/05/2019               | Pool of 5 cloacal swabs maximum           |
| EPI_ISL_3915049 | 33-4-PTS | A/Gallus gallus/Belgium/4753_0001/2019(H3N1) | 33           | WVL      | 4               | Breeders-layers  | 10/05/2019               | Pool of 5 tracheal swabs maximum          |
| EPI_ISL_3915376 | 34-2-PCS | A/Gallus gallus/Belgium/4768_0002/2019(H3N1) | 34           | OVL      | 2               | Layers           | 10/05/2019               | Pool of 5 cloacal swabs maximum           |
| EPI_ISL_3915377 | 35-4-PCS | A/Gallus gallus/Belgium/5063_0002/2019(H3N1) | 35           | WVL      | 4               | Layers           | 16/5/2019                | Pool of 5 cloacal swabs maximum           |
| EPI_ISL_3915378 | 36-1-POO | A/Gallus gallus/Belgium/4846_0001/2019(H3N1) | 36           | WVL      | 1               | Breeders-broiler | 13/05/2019               | Pooled lung + trachea + intestine + brain |
| EPI_ISL_3915379 | 36-2-POO | A/Gallus gallus/Belgium/4846_0002/2019(H3N1) | 36           | WVL      | 2               | Breeders-broiler | 13/05/2019               | Pooled lung + trachea + intestine + brain |
| EPI_ISL_3915380 | 37-A-POO | A/Gallus gallus/Belgium/4890_0001/2019(H3N1) | 37           | WVL      | a               | Layers           | 14/05/2019               | Pooled lung + trachea + intestine + brain |
| EPI_ISL_3915381 | 37-B-POO | A/Gallus gallus/Belgium/4890_0002/2019(H3N1) | 37           | WVL      | b               | Layers           | 14/05/2019               | Pooled lung + trachea + intestine + brain |
| EPI_ISL_3915382 | 38-1-POO | A/turkey/Belgium/4914_0001/2019(H3N1)        | 38           | WVL      | 1               | Broiler-turkey   | 15/05/2019               | Pooled lung + trachea +intestine + brain  |
| EPI_ISL_3915383 | 39-2-PCS | A/Gallus gallus/Belgium/4982_0002/2019(H3N1) | 39           | OVL      | 2               | Layers           | 14/05/2019               | Pool of 5 cloacal swabs maximum           |
| EPI_ISL_3915384 | 39-1-PCS | A/Gallus gallus/Belgium/5192_0002/2019(H3N1) | 39           | OVL      | 1               | Layers           | 20/05/2019               | Pool of 5 cloacal swabs maximum           |
| EPI_ISL_3915385 | 40-1-PCS | A/Gallus gallus/Belgium/5060_0002/2019(H3N1) | 40           | WVL      | 1               | Layers           | 16/05/2019               | Pool of 5 cloacal swabs maximum           |
| EPI_ISL_3915386 | 42-3-POO | A/Gallus gallus/Belgium/5051_0003/2019(H3N1) | 42           | WVL      | 3               | Breeders-broiler | 17/05/2019               | Pooled lung + trachea + intestine + brain |
| EPI_ISL_3915387 | 44-1-PTL | A/Ostrich/Belgium/5049_0001/2019(H3N1)       | 44           | WVL      | 1               | Ostrich          | 5/06/2019                | Pooled lung +trachea                      |
| EPI_ISL_3915388 | 45-1-POO | A/Gallus gallus/Belgium/5110_0001/2019(H3N1) | 45           | WVL      | 1               | Breeders-broiler | 17/05/2019               | Pooled organs                             |
| EPI_ISL_3915389 | 45-3-POO | A/Gallus gallus/Belgium/5113_0001/2019(H3N1) | 45           | WVL      | 3               | Breeders-broiler | 17/05/2019               | Pooled organs                             |
| EPI_ISL_3915390 | 45-2-POO | A/Gallus gallus/Belgium/5481_0002/2019(H3N1) | 45           | WVL      | 2               | Breeders-broiler | 24/05/2019               | Pooled lung + trachea + intestine + brain |
| EPI_ISL_3915391 | 47-1-POO | A/Gallus gallus/Belgium/5593_0001/2019(H3N1) | 47           | WVL      | 1               | Breeders-broiler | 27/05/2019               | Pooled lung + trachea + intestine + brain |

| Accession nos.† | SeqID‡     | Strain name                                  | Outbreak no. | Province | Production unit | Production type  | Sample date (dd/mm/yyyy) | Sample type                               |
|-----------------|------------|----------------------------------------------|--------------|----------|-----------------|------------------|--------------------------|-------------------------------------------|
| EPI_ISL_3915392 | 48-1-POO   | A/Gallus gallus/Belgium/5426_0001/2019(H3N1) | 48           | WVL      | 2               | Breeders-layers  | 22/05/2019               | Pooled lung + trachea + intestine + brain |
| EPI_ISL_3915393 | 49-4-PTS   | A/Turkey/Belgium/5427_0001/2019(H3N1)        | 49           | WVL      | 4               | Broiler-turkey   | 21/05/2019               | Pool of 5 tracheal swabs maximum          |
| EPI_ISL_3915394 | 50-1-PCS   | A/Gallus gallus/Belgium/5430_0002/2019(H3N1) | 50           | OVL      | 1               | Layers           | 21/05/2019               | Pool of 5 cloacal swabs maximum           |
| EPI_ISL_3915395 | 50-2-PCS   | A/Gallus gallus/Belgium/5432_0002/2019(H3N1) | 50           | OVL      | 2               | Layers           | 21/05/2019               | Pool of 5 cloacal swabs maximum           |
| EPI_ISL_3915396 | 51-2-POO   | A/Gallus gallus/Belgium/5484_0001/2019(H3N1) | 51           | WVL      | 2               | Breeders-broiler | 26/05/2019               | Pooled organs                             |
| EPI_ISL_3915397 | 52-2-POO   | A/Turkey/Belgium/5478_0001/2019(H3N1)        | 52           | WVL      | 2               | Broiler-turkey   | 24/05/2019               | Pooled lung + trachea + intestine + brain |
| EPI_ISL_3915398 | 54-1-POO   | A/Gallus gallus/Belgium/5534_0001/2019(H3N1) | 54           | WVL      | 1               | Layers           | 26/05/2019               | Pooled lung + trachea + intestine + brain |
| EPI_ISL_3915516 | 56-7-POO   | A/Gallus gallus/Belgium/5772_0001/2019(H3N1) | 56           | WVL      | 7               | Breeders-broiler | 3/06/2019                | Pooled lung + trachea + intestine + brain |
| EPI_ISL_3915517 | 56-8-POO   | A/Gallus gallus/Belgium/5772_0002/2019(H3N1) | 56           | WVL      | 8               | Breeders-broiler | 3/06/2019                | Pooled lung + trachea + intestine + brain |
| EPI_ISL_3915399 | 56-1-POO   | A/Gallus gallus/Belgium/5570_0001/2019(H3N1) | 56           | WVL      | 1               | Breeders-broiler | 27/05/2019               | Pooled organs                             |
| EPI_ISL_3915400 | 57-14-iPCS | A/Gallus gallus/Belgium/5679_0002/2019(H3N1) | 57           | WVL      | 14              | Breeders-broiler | 29/05/2019               | Isolate (pool of 5 cloacal swabs maximum) |
| EPI_ISL_3915401 | 57-11-PCS  | A/Gallus gallus/Belgium/5869_0002/2019(H3N1) | 57           | WVL      | 11              | Breeders-broiler | 6/06/2019                | Pool of 5 cloacal swabs maximum           |
| EPI_ISL_3915402 | 58-1-PCS   | A/Gallus gallus/Belgium/5680_0002/2019(H3N1) | 58           | WVL      | 1               | Layers           | 29/05/2019               | Pool of 5 cloacal swabs maximum           |
| EPI_ISL_3915403 | 60-1-POO   | A/Gallus gallus/Belgium/5769_0001/2019(H3N1) | 60           | WVL      | 1               | Breeders-broiler | 4/06/2019                | Pooled lung + trachea + intestine + brain |
| EPI_ISL_3915404 | 62-1-POO   | A/Gallus gallus/Belgium/5771_0001/2019(H3N1) | 62           | WVL      | 1               | Layers           | 3/06/2019                | Pooled organs                             |
| EPI_ISL_3915405 | 63-1-POO   | A/Gallus gallus/Belgium/5770_0001/2019(H3N1) | 63           | OVL      | 1               | Breeders - layer | 3/06/2019                | Pooled organs                             |
| EPI_ISL_3915406 | 64-1-PCS   | A/Gallus gallus/Belgium/5766_0001/2019(H3N1) | 64           | OVL      | 2               | Breeders-broiler | 3/06/2019                | Pool of 5 cloacal swabs maximum           |
| EPI_ISL_3915407 | 65-2-PCS   | A/Gallus gallus/Belgium/5819_0002/2019(H3N1) | 65           | WVL      | 2               | Layers           | 1/06/2019                | Pool of 5 cloacal swabs maximum           |
| EPI_ISL_3915408 | 66-1-PCS   | A/Gallus gallus/Belgium/5826_0002/2019(H3N1) | 66           | WVL      | 1               | Layers           | 4/06/2019                | Pool of 5 cloacal swabs maximum           |
| EPI_ISL_3915409 | 66-2-PCS   | A/Gallus gallus/Belgium/6121_0002/2019(H3N1) | 66           | WVL      | 2               | Layers           | 13/06/2019               | Pool of 5 cloacal swabs maximum           |
| EPI_ISL_3915410 | 67-4-PTS   | A/Gallus gallus/Belgium/5824_0001/2019(H3N1) | 67           | WVL      | 4               | Breeders-broiler | 4/06/2019                | Pool of 5 tracheal swabs maximum          |
| EPI_ISL_3915411 | 68-1-PCS   | A/Gallus gallus/Belgium/5924_0002/2019(H3N1) | 68           | LUX      | 1               | Layers           | 4/06/2019                | Pool of 5 cloacal swabs maximum           |
| EPI_ISL_3915412 | 69-2-POO   | A/Gallus gallus/Belgium/5870_0002/2019(H3N1) | 69           | WVL      | 2               | Broiler          | 6/06/2019                | Pooled lung + trachea + intestine + brain |
| EPI_ISL_3915413 | 70-1-PTS   | A/Gallus gallus/Belgium/5934_0001/2019(H3N1) | 70           | WVL      | 1               | Layers           | 6/06/2019                | Pool of 3 tracheal swabs maximum          |

| Accession nos.† | SeqID‡    | Strain name                                  | Outbreak no. | Province | Production unit | Production type        | Sample date (dd/mm/yyyy) | Sample type                                         |
|-----------------|-----------|----------------------------------------------|--------------|----------|-----------------|------------------------|--------------------------|-----------------------------------------------------|
| EPI_ISL_3915414 | 71-6-PCS  | A/Gallus gallus/Belgium/5956_0002/2019(H3N1) | 71           | WVL      | 6               | Breeders-broiler       | 7/06/2019                | Pool of 5 cloacal swabs maximum                     |
| EPI_ISL_3915415 | 71-7-PCS  | A/Gallus gallus/Belgium/6132_0002/2019(H3N1) | 71           | WVL      | 7               | Breeders-broiler       | 12/06/2019               | Pool of 5 cloacal swabs maximum                     |
| EPI_ISL_3915416 | 72-1-iPOO | A/Gallus gallus/6079/2019(H3N1)              | 72           | WVL      | 1               | Breeders-broiler       | 12/06/2019               | Isolate (pooled lung + trachea + intestine + brain) |
| EPI_ISL_3915417 | 73-1-PTS  | A/Gallus gallus/Belgium/6082_0002/2019(H3N1) | 73           | WVL      | 1               | Breeders-layer + quail | 12/06/2019               | Pool of 5 tracheal swabs maximum                    |
| EPI_ISL_3915418 | 73-2-PCS  | A/Gallus gallus/Belgium/6094_0001/2019(H3N1) | 73           | WVL      | 2               | Breeders-layer + quail | 13/06/2019               | Pool of 5 cloacal swabs maximum                     |
| EPI_ISL_3915419 | 75-1-iPCS | A/Gallus gallus/Belgium/6486/2019(H3N1)      | 75           | WVL      | 1               | Layers                 | 22/06/2019               | Isolate (pool of 5 cloacal swabs maximum)           |
| EPI_ISL_3915420 | 77-1-iPOO | A/Gallus gallus/Belgium/6519/2019(H3N1)      | 77           | WVL      | 1               | Broilers               | 24/06/2019               | Isolate (pooled lung + trachea + intestine + brain) |
| EPI_ISL_3915421 | 78-1-PCS  | A/Gallus gallus/Belgium/6648_0001/2019(H3N1) | 78           | WVL      | 1               | Breeders-broiler       | 28/06/2019               | Pool of 5 cloacal swabs maximum                     |
| EPI_ISL_3915422 | 80-3-PCS  | A/Gallus gallus/Belgium/7200_0001/2019(H3N1) | 80           | WVL      | 3               | Breeders-layer         | 11/07/2019               | Pool of 5 cloacal swabs maximum                     |
| EPI_ISL_3915423 | 81-1-iPOO | A/Gallus gallus/Belgium/6986/2019(H3N1)      | 81           | WVL      | 1               | Breeders-broiler       | 9/07/2019                | Isolate (pooled lung + trachea + intestine + brain) |

\*LUX, Luxembourg; OVL, Oost-Vlaanderen; WVL, West-Vlaanderen.

†GISAID EpiFlu (<https://www.gisaid.org>) or Genbank accession numbers.

‡Sequence identification numbers from phylogeographic analysis.

**Appendix Table 3.** Sequencing coverage breadth for different avian influenza virus gene segments in study combining phylogeographic analyses and epidemiologic contact tracing to characterize atypically pathogenic H3N1 avian influenza epidemic, Belgium, 2019\*

| SeqID†     | S1-PB2 | S2-PB1 | S3-PA | S4-HA | S5-NP | S6-NA | S7-MP | S8-NS |
|------------|--------|--------|-------|-------|-------|-------|-------|-------|
| 1-1-iPTL   | 100    | 100    | 100   | 100   | 100   | 100   | 100   | 100   |
| 0-1-PTL    | 100    | 100    | 0     | 100   | 100   | 92    | 100   | 100   |
| 2-1-iPTL   | 100    | 100    | 100   | 100   | 100   | 100   | 100   | 100   |
| 2-1-PTL-2  | 100    | 97     | 100   | 100   | 100   | 100   | 100   | 100   |
| 3-1-PTS    | 0      | 0      | 0     | 0     | 100   | 0     | 100   | 100   |
| 4-1-iPTL   | 100    | 100    | 100   | 100   | 100   | 100   | 100   | 100   |
| 4-1-PTL-2  | 0      | 0      | 0     | 100   | 0     | 0     | 0     | 100   |
| 5-1-PCS    | 100    | 100    | 100   | 100   | 100   | 100   | 100   | 100   |
| 6-1-iPTL   | 100    | 100    | 100   | 100   | 100   | 100   | 100   | 100   |
| 7-1-iBOW   | 100    | 100    | 100   | 100   | 100   | 100   | 100   | 100   |
| 8-1-PCS    | 100    | 100    | 100   | 100   | 100   | 100   | 100   | 100   |
| 8-3-PCS    | 100    | 100    | 100   | 100   | 100   | 100   | 100   | 100   |
| 9-2-BOW    | 100    | 100    | 100   | 100   | 100   | 100   | 100   | 100   |
| 11-1-PLT   | 100    | 100    | 100   | 100   | 100   | 100   | 100   | 100   |
| 11-1-POO   | 100    | 69     | 100   | 100   | 100   | 100   | 100   | 100   |
| 11-4-POO   | 82     | 100    | 49    | 100   | 100   | 100   | 100   | 100   |
| 12-1-iBOW  | 100    | 100    | 100   | 100   | 100   | 100   | 100   | 100   |
| 13-4-iBOW  | 100    | 100    | 100   | 100   | 100   | 100   | 100   | 100   |
| 13-5-BOW   | 61     | 100    | 100   | 100   | 100   | 100   | 100   | 100   |
| 14-1-PTL   | 100    | 100    | 100   | 100   | 100   | 100   | 100   | 100   |
| 14-1-iBOW  | 100    | 100    | 100   | 100   | 100   | 100   | 100   | 100   |
| 14-3-PTS-1 | 100    | 100    | 100   | 100   | 100   | 100   | 100   | 100   |
| 14-3-PTS-2 | 100    | 100    | 100   | 100   | 100   | 100   | 100   | 100   |
| 15-1-iBRA  | 100    | 100    | 100   | 100   | 100   | 100   | 100   | 100   |
| 16-1-POO   | 100    | 100    | 100   | 100   | 100   | 100   | 100   | 100   |
| 16-1-BOW   | 23     | 0      | 0     | 39    | 80    | 0     | 100   | 100   |
| 17-1-POO   | 0      | 0      | 0     | 87    | 96    | 0     | 94    | 100   |
| 19-2-PCS   | 92     | 85     | 58    | 0     | 99    | 82    | 100   | 100   |
| 19-1-PCS   | 100    | 100    | 100   | 100   | 100   | 100   | 100   | 100   |
| 20-1-PCS   | 100    | 100    | 100   | 100   | 100   | 100   | 100   | 100   |
| 21-3-PTL   | 100    | 100    | 100   | 100   | 100   | 100   | 100   | 100   |
| 21-1-POO   | 100    | 100    | 100   | 100   | 100   | 100   | 100   | 100   |
| 21-2-POO   | 100    | 100    | 100   | 100   | 100   | 100   | 100   | 100   |
| 22-6-PCS   | 100    | 100    | 100   | 100   | 100   | 100   | 100   | 100   |
| 22-4-PTS   | 100    | 100    | 100   | 100   | 100   | 100   | 100   | 100   |
| 23-2-PCS   | 100    | 100    | 100   | 100   | 100   | 100   | 100   | 100   |
| 23-1-PCS   | 100    | 100    | 100   | 100   | 100   | 100   | 100   | 100   |
| 24-2-POO   | 100    | 100    | 100   | 100   | 100   | 100   | 100   | 100   |
| 24-3-POO   | 100    | 100    | 100   | 100   | 100   | 100   | 100   | 100   |
| 24-4-POO   | 100    | 0      | 0     | 100   | 100   | 0     | 100   | 100   |
| 24-1-PCS   | 100    | 47     | 100   | 100   | 100   | 100   | 100   | 100   |
| 26-1-POO   | 0      | 0      | 0     | 0     | 100   | 0     | 100   | 100   |
| 27-2-POO   | 100    | 57     | 100   | 0     | 100   | 100   | 100   | 100   |
| 27-8-PTLB  | 42     | 0      | 100   | 100   | 100   | 0     | 100   | 100   |
| 28-2-PCS   | 100    | 14     | 31    | 100   | 100   | 0     | 100   | 100   |
| 29-2-PTS   | 100    | 100    | 100   | 100   | 100   | 100   | 100   | 100   |
| 30-2-PCS   | 100    | 100    | 100   | 100   | 100   | 100   | 100   | 100   |
| 30-1-PCS   | 100    | 100    | 100   | 100   | 100   | 100   | 100   | 100   |
| 31-2-POO   | 100    | 100    | 100   | 100   | 100   | 100   | 100   | 100   |
| 31-3-POO   | 100    | 100    | 100   | 100   | 100   | 100   | 100   | 100   |
| 31-E-POO   | 0      | 16     | 0     | 92    | 100   | 0     | 100   | 100   |
| 32-1-PCS   | 100    | 100    | 100   | 100   | 100   | 100   | 100   | 100   |
| 33-1-PCS   | 100    | 100    | 100   | 100   | 100   | 96    | 100   | 100   |
| 33-4-PTS   | 100    | 100    | 100   | 100   | 100   | 100   | 100   | 100   |
| 34-2-PCS   | 100    | 100    | 100   | 100   | 100   | 100   | 100   | 100   |
| 35-4-PCS   | 100    | 100    | 100   | 100   | 100   | 100   | 100   | 100   |
| 36-1-POO   | 35     | 0      | 0     | 0     | 0     | 0     | 85    | 100   |
| 36-2-POO   | 100    | 100    | 100   | 100   | 100   | 100   | 100   | 100   |
| 37-A-POO   | 100    | 100    | 100   | 100   | 100   | 100   | 100   | 100   |
| 37-B-POO   | 100    | 100    | 100   | 100   | 100   | 100   | 100   | 100   |
| 38-1-POO   | 100    | 0      | 0     | 100   | 100   | 48    | 100   | 100   |
| 39-2-PCS   | 100    | 100    | 100   | 100   | 100   | 100   | 100   | 100   |
| 39-1-PCS   | 100    | 100    | 100   | 100   | 100   | 100   | 100   | 100   |
| 40-1-PCS   | 0      | 29     | 26    | 100   | 0     | 100   | 100   | 100   |
| 42-3-POO   | 100    | 100    | 100   | 100   | 100   | 100   | 100   | 100   |
| 44-1-PTL   | 19     | 0      | 0     | 0     | 0     | 0     | 0     | 100   |



| SeqID†     | S1-PB2 | S2-PB1 | S3-PA | S4-HA | S5-NP | S6-NA | S7-MP | S8-NS |
|------------|--------|--------|-------|-------|-------|-------|-------|-------|
| 45-1-POO   | 100    | 100    | 0     | 0     | 0     | 0     | 100   | 100   |
| 45-3-POO   | 100    | 100    | 100   | 100   | 100   | 100   | 100   | 100   |
| 45-2-POO   | 100    | 100    | 100   | 100   | 100   | 100   | 100   | 100   |
| 47-1-POO   | 100    | 100    | 100   | 100   | 100   | 100   | 100   | 100   |
| 48-1-POO   | 100    | 100    | 100   | 100   | 100   | 100   | 100   | 100   |
| 49-4-PTS   | 100    | 100    | 100   | 100   | 100   | 100   | 100   | 100   |
| 50-1-PCS   | 100    | 100    | 100   | 100   | 100   | 100   | 100   | 100   |
| 50-2-PCS   | 100    | 100    | 100   | 100   | 100   | 100   | 100   | 100   |
| 51-2-POO   | 100    | 100    | 100   | 100   | 100   | 100   | 100   | 100   |
| 52-2-POO   | 23     | 0      | 19    | 0     | 100   | 0     | 100   | 59    |
| 54-1-POO   | 70     | 93     | 0     | 93    | 100   | 93    | 100   | 100   |
| 56-7-POO   | 100    | 100    | 100   | 100   | 100   | 100   | 100   | 100   |
| 56-8-POO   | 100    | 100    | 100   | 100   | 100   | 100   | 100   | 100   |
| 56-1-POO   | 100    | 0      | 100   | 0     | 0     | 100   | 100   | 100   |
| 57-14-iPCS | 100    | 100    | 100   | 100   | 100   | 100   | 100   | 100   |
| 57-11-PCS  | 0      | 0      | 0     | 70    | 100   | 100   | 100   | 100   |
| 58-1-PCS   | 100    | 100    | 100   | 100   | 100   | 100   | 100   | 100   |
| 60-1-POO   | 63     | 0      | 53    | 0     | 90    | 0     | 100   | 100   |
| 62-1-POO   | 100    | 100    | 100   | 100   | 100   | 100   | 100   | 100   |
| 63-1-POO   | 100    | 69     | 24    | 100   | 100   | 100   | 100   | 100   |
| 64-1-PCS   | 35     | 0      | 100   | 100   | 100   | 0     | 100   | 100   |
| 65-2-PCS   | 100    | 100    | 100   | 100   | 100   | 100   | 100   | 100   |
| 66-1-PCS   | 100    | 100    | 100   | 100   | 100   | 100   | 100   | 100   |
| 66-2-PCS   | 100    | 100    | 97    | 100   | 100   | 100   | 100   | 100   |
| 67-4-PTS   | 12     | 0      | 0     | 0     | 100   | 0     | 100   | 100   |
| 68-1-PCS   | 100    | 100    | 100   | 100   | 100   | 100   | 100   | 100   |
| 69-2-POO   | 100    | 100    | 99    | 100   | 100   | 100   | 100   | 100   |
| 70-1-PTS   | 100    | 100    | 100   | 100   | 100   | 100   | 100   | 100   |
| 71-6-PCS   | 0      | 52     | 38    | 100   | 100   | 0     | 100   | 100   |
| 71-7-PCS   | 100    | 100    | 100   | 100   | 100   | 100   | 100   | 100   |
| 72-1-iPOO  | 100    | 100    | 100   | 100   | 100   | 100   | 100   | 100   |
| 73-1-PTS   | 100    | 100    | 100   | 100   | 100   | 100   | 100   | 100   |
| 73-2-PCS   | 100    | 100    | 100   | 100   | 100   | 100   | 100   | 100   |
| 75-1-iPCS  | 100    | 100    | 100   | 100   | 100   | 100   | 100   | 100   |
| 77-1-iPOO  | 100    | 100    | 100   | 100   | 100   | 100   | 100   | 100   |
| 78-1-PCS   | 0      | 0      | 0     | 0     | 0     | 0     | 100   | 95    |
| 80-3-PCS   | 100    | 100    | 100   | 100   | 100   | 100   | 100   | 100   |
| 81-1-iPOO  | 100    | 100    | 100   | 100   | 100   | 100   | 100   | 100   |

\*Values are percent sequencing coverage. S1-PB2, segment 1-polymerase basic protein 2; S2-PB1, segment 2-polymerase basic protein 1; S3-PA, segment 3-polymerase acidic protein; S4-HA, segment 4-hemagglutinin; S5-NP, segment 5-nucleoprotein; S6-NA, segment 6-neuraminidase; S7-MP, segment 7-matrix protein; S8-NS, segment 8-nonstructural protein.

†Sequence identification numbers from phylogeographic analysis.

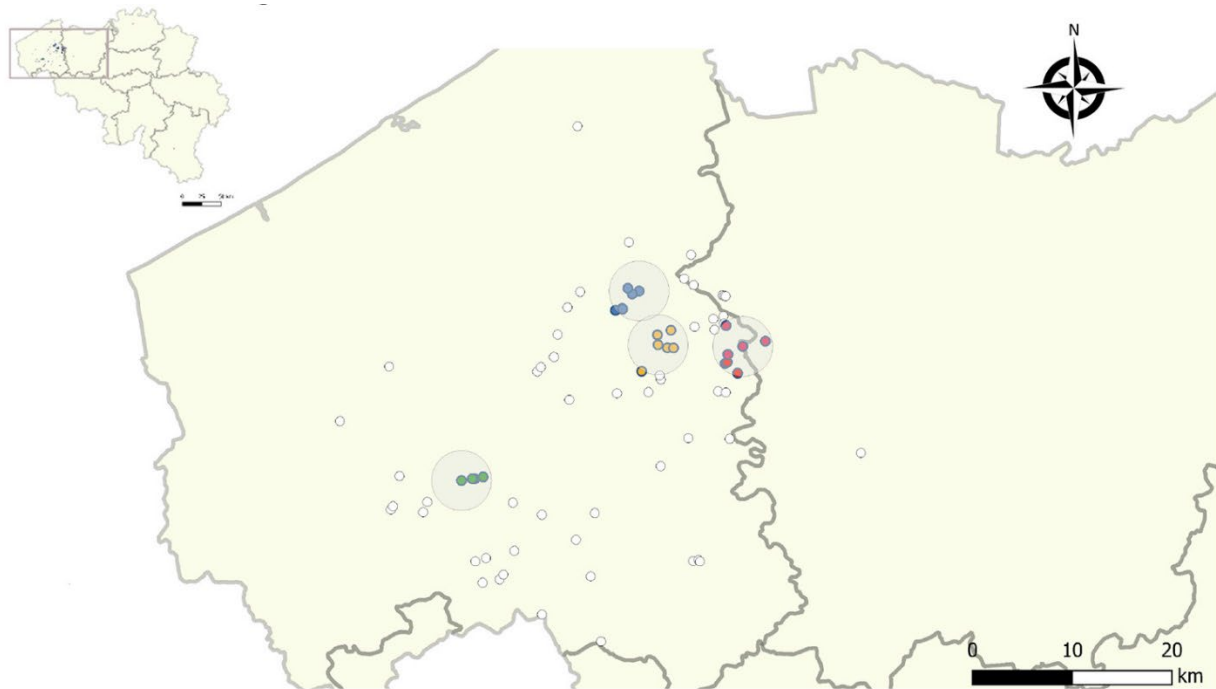

**Appendix Figure 1.** SaTScan spatiotemporal clustering of avian influenza H3N1-affected farms in study combining phylogeographic analyses and epidemiologic contact tracing to characterize atypically pathogenic H3N1 avian influenza epidemic, Belgium, 2019. We detected spatiotemporal case clusters by using SaTScan v.9.6 (<https://www.SaTScan.org>). Clusters with a 3 km radius are plotted on the map of West Flanders and East Flanders, Belgium, using colors to identify the order of occurrence. Cluster 1 included the index case (red), clusters 2 (yellow) and 3 (blue) represented short distance dispersal in a westerly direction, and cluster 4 (green) represented a medium distance (<50 km) dispersal in a southwesterly direction.

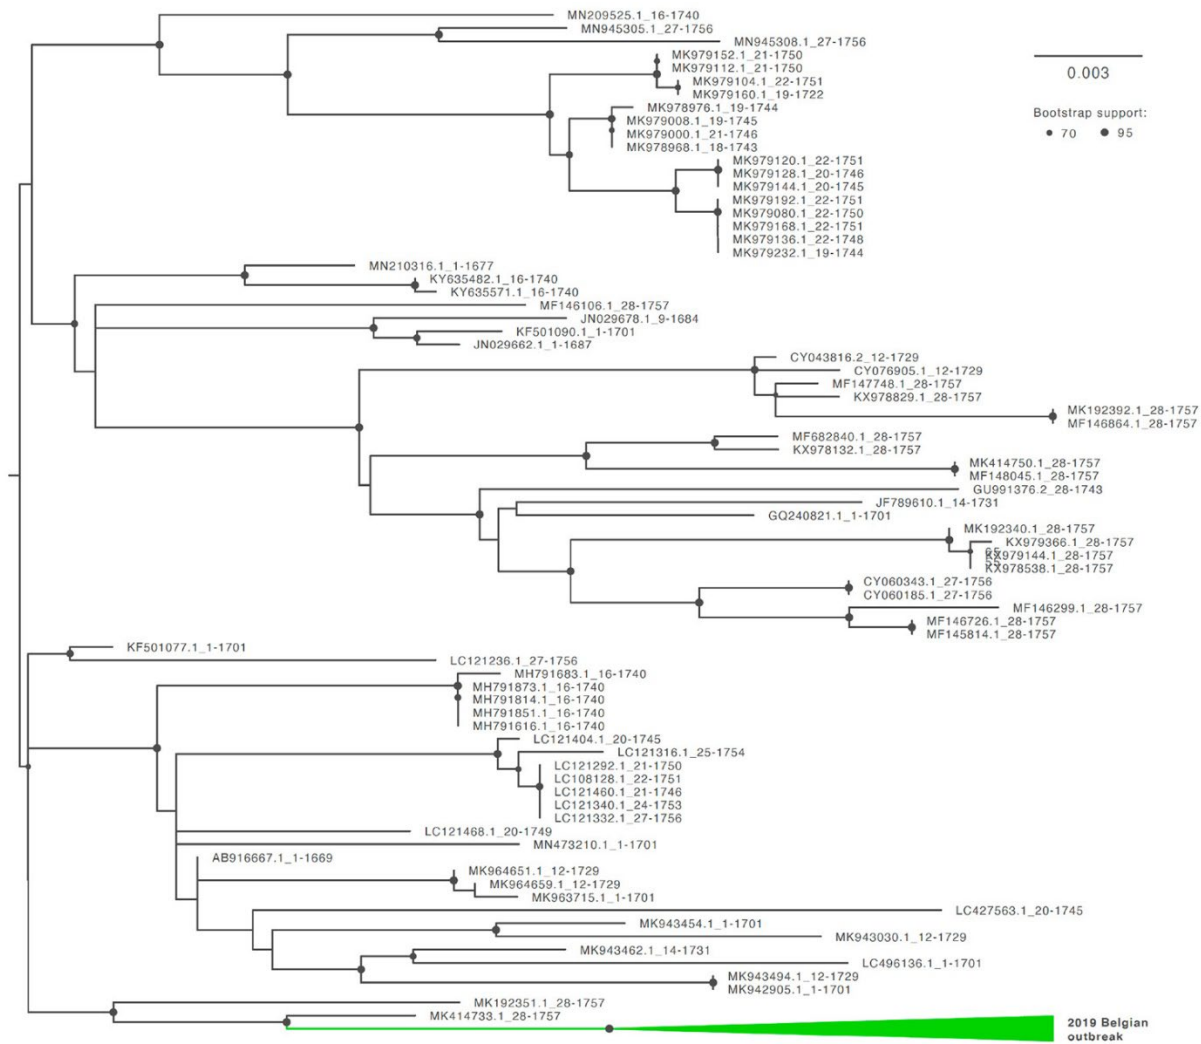

**Appendix Figure 2.** Preliminary phylogenetic analysis of the H3 gene segment in study combining phylogeographic analyses and epidemiologic contact tracing to characterize atypically pathogenic H3N1 avian influenza epidemic, Belgium, 2019. Phylogenetic tree was generated for the hemagglutinin 3 (H3) segment of avian influenza virus by using the maximum-likelihood method. Analysis was based on all hemagglutinin gene sequences generated in the present study and 80 H3Nx hemagglutinin gene segment sequences from outside of Belgium selected to represent the diversity of H3Nx viruses circulating in Eurasia before the introduction of the H3N1 virus in Belgium in 2019 (GenBank sequences available on February 12, 2020). Scale bar indicates nucleotide substitutions per site.

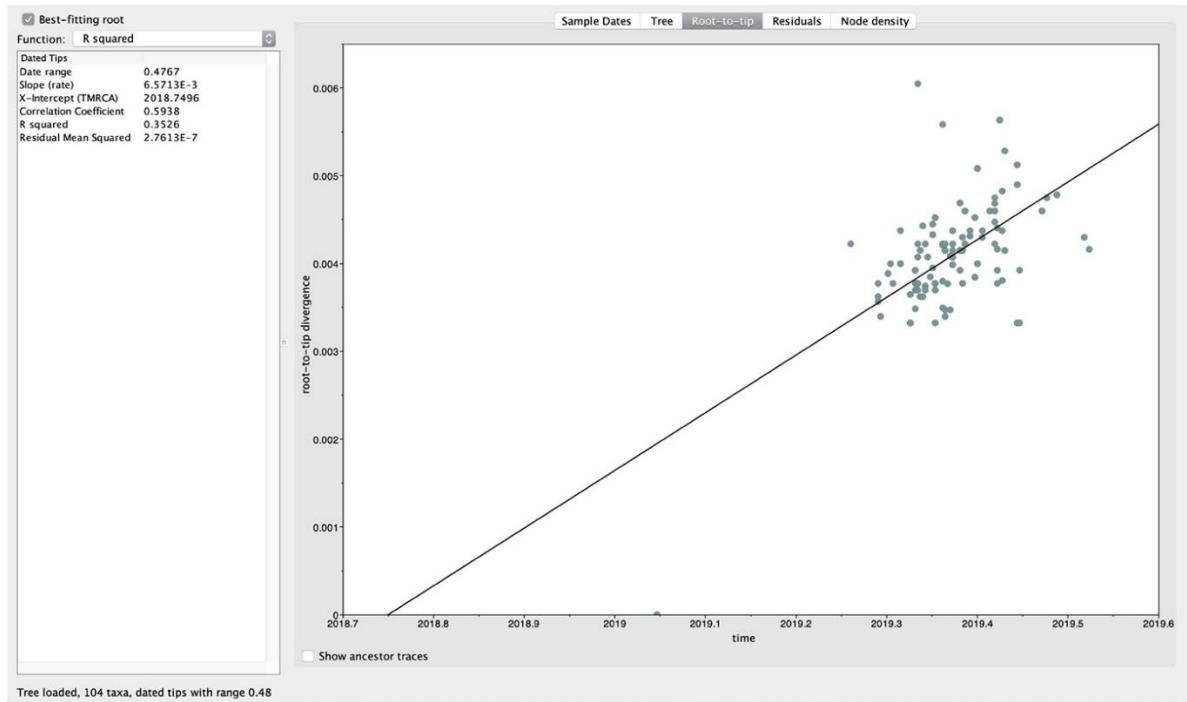

**Appendix Figure 3.** Root-to-tip regression analysis of phylogenetic temporal signal in study combining phylogeographic analyses and epidemiologic contact tracing to characterize atypically pathogenic H3N1 avian influenza epidemic, Belgium, 2019. We plotted root-to-tip genetic distances against sequence sampling times from July 2018 through June 2019 by using the program TempEst (10), best-fitting the root by maximizing the coefficient of determination  $R^2$  ( $R^2 = 0.32$ ).

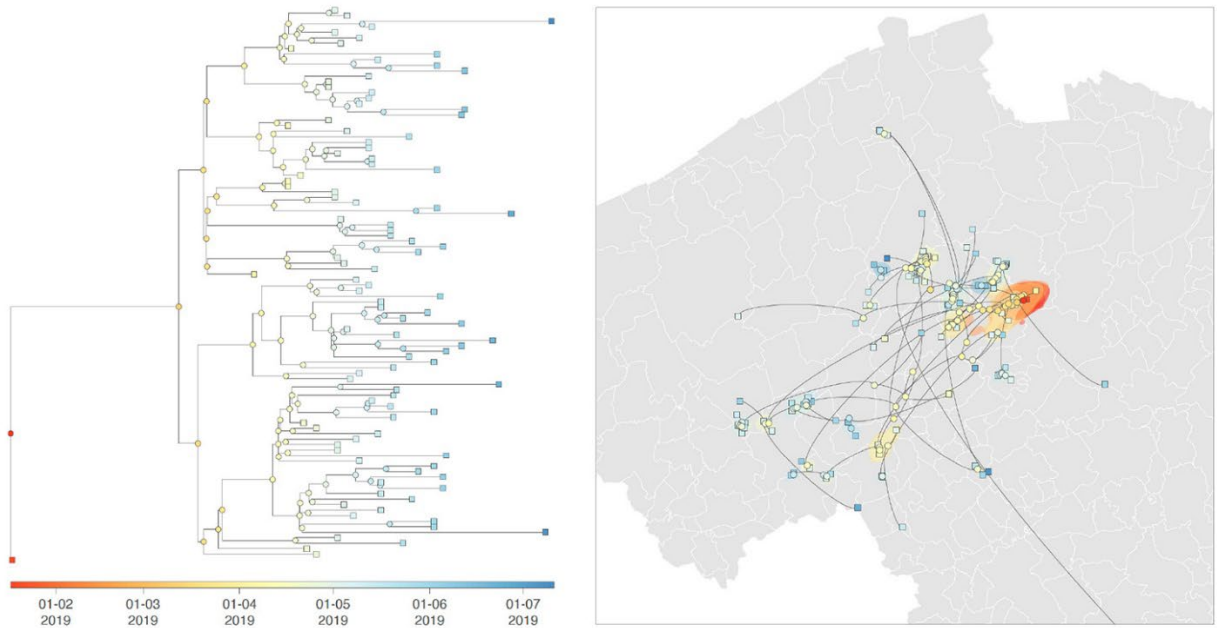

**Appendix Figure 4.** Phylogeographic reconstruction of the dispersal history of H3N1 lineages during the 2019 Belgian epidemic in study combining phylogeographic analyses and epidemiologic contact tracing to characterize atypically pathogenic H3N1 avian influenza epidemic, Belgium, 2019. Time-scaled maximum clade credibility (MCC) tree (left panel) was obtained by continuous phylogeographic inference and was based on 1,000 posterior trees. The MCC tree was superimposed on 80% highest posterior density polygons (shaded regions) reflecting phylogeographic uncertainty associated with the inferred position of internal nodes (right panel). Tips (squares) and internal nodes (circles) of the MCC tree are colored according to the outbreak date. Dispersal direction of viral lineages are indicated by the edge curvature (dispersal direction is anticlockwise).
